# Supplementary material
Source: Springer Nature journal article supplement (https://www.springermedizin.de/resource/supplementary/12885_2014_4631_MOESM6_ESM.pdf/9466878)

**a****Concentration of CO in blood (nM)**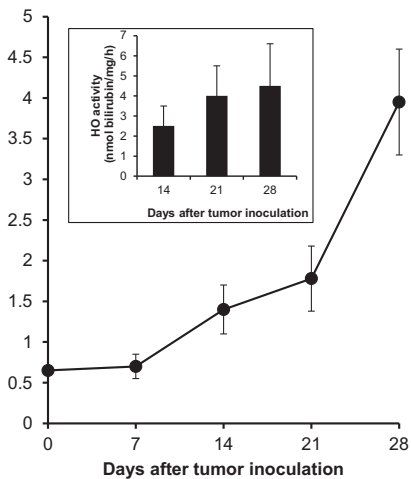**b****Tumor volume (mm<sup>3</sup>)**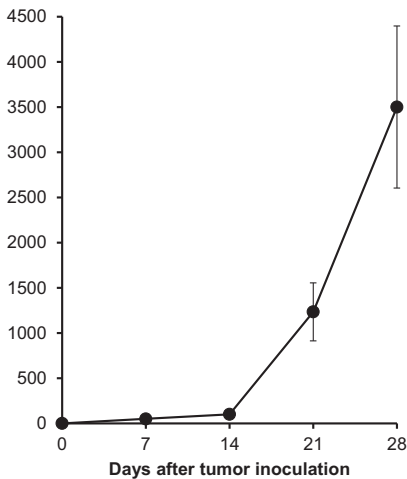

Supplement: MOESM6 [file 9466878]
